# Supplementary material for: Ion counting demonstrates a high electrostatic field generated by the nucleosome
Source: eLife journal article supplement (doi:10.7554/elife.44993), 2019-06-11
Supplement: supp [file elife-44993-supp-v1.zip]

Archive with 13 entries (13 files):
- elife_poa_e44993_Figure_3_source_data_1.pdf
- elife_poa_e44993_Figure_3_source_data_6.pdf
- elife_poa_e44993_Figure_3_figure_supplement_1.pdf
- elife_poa_e44993_Source_code_1.c
- elife_poa_e44993_Figure_3_source_data_3.pdf
- elife_poa_e44993_Transparent_Reporting_File.docx
- elife_poa_e44993_Figure_3_source_data_2.pdf
- elife_poa_e44993_Figure_3_figure_supplement_3.pdf
- elife_poa_e44993_Figure_3_source_data_7.pdf
- elife_poa_e44993_Figure_4_figure_supplement_1.pdf
- elife_poa_e44993_Figure_3_source_data_5.pdf
- elife_poa_e44993_Figure_3_source_data_4.pdf
- elife_poa_e44993_Figure_3_figure_supplement_2.pdf
