# Supplementary material for: Ion counting demonstrates a high electrostatic field generated by the nucleosome
Source: eLife journal article supplement (doi:10.7554/elife.44993), 2019-06-11
Supplement: supp [file elife-44993-supp-v1.zip › elife_poa_e44993_Figure_3_source_data_1.pdf]

**Figure 3 - Source Data 1: Experimentally determined excess number ( $N_i$ ), the  $\beta_+$  coefficient (the faction of associated cations), and the  $\beta_-$  coefficient (the faction of excluded anions)) for 10 mM NaBr around 147 bp DNA**

|           | free dsDNA        |               |                         |                                |
|-----------|-------------------|---------------|-------------------------|--------------------------------|
|           | $N_{Na^+}$        | $N_{Br^-}$    | total<br>(experimental) | $q_{\text{molecule}}$ (theory) |
|           | $247 \pm 4.9$     | $-45 \pm 2.9$ | $292 \pm 4.9$           | -292                           |
| $\beta_+$ | $0.846 \pm 0.019$ |               |                         |                                |
| $\beta_-$ | $0.157 \pm 0.008$ |               |                         |                                |
