# Supplementary material for: Ion counting demonstrates a high electrostatic field generated by the nucleosome
Source: eLife journal article supplement (doi:10.7554/elife.44993), 2019-06-11
Supplement: supp [file elife-44993-supp-v1.zip › elife_poa_e44993_Figure_3_source_data_2.pdf]

**Figure 3 - Source Data 2: Experimentally determined excess number ( $N_i$ ), the  $\beta_+$  coefficient (the faction of associated cations), and the  $\beta_-$  coefficient (the faction of excluded anions) for 10 mM NaBr around canonical nucleosome**

|           | <b>canonical<br/>nucleosome</b> |               |                         |                                          |
|-----------|---------------------------------|---------------|-------------------------|------------------------------------------|
|           | $N_{Na^+}$                      | $N_{Br^-}$    | total<br>(experimental) | $q_{\text{molecule}} \text{ (theory)}^*$ |
|           | $119 \pm 1.7$                   | $-24 \pm 2.6$ | $144 \pm 1.7$           | -144                                     |
| $\beta_+$ | $0.826 \pm 0.020$               |               |                         |                                          |
| $\beta_-$ | $0.166 \pm 0.015$               |               |                         |                                          |

\* overall charge of the 147bp DNA is -292e and the overall charge of the histone core based on amino acid composition is +148e (Table S8)
