# Supplementary material for: Ion counting demonstrates a high electrostatic field generated by the nucleosome
Source: eLife journal article supplement (doi:10.7554/elife.44993), 2019-06-11
Supplement: supp [file elife-44993-supp-v1.zip › elife_poa_e44993_Figure_3_source_data_3.pdf]

**Figure 3 - Source Data 3: Experimentally determined excess number ( $N_i$ ), the  $\beta_+$  coefficient (the faction of associated cations), and the  $\beta_-$  coefficient (the faction of excluded anions) for 10 mM NaBr around H3 tailless nucleosome**

|           | <b>H3 tailless nucleosome</b> |               |                      |                                |
|-----------|-------------------------------|---------------|----------------------|--------------------------------|
|           | $N_{Na^+}$                    | $N_{Br^-}$    | total (experimental) | $q_{\text{molecule}}$ (theory) |
|           | $140 \pm 4.2$                 | $-18 \pm 4.0$ | $160 \pm 3.1$        | -160                           |
| $\beta_+$ | $0.875 \pm 0.025$             |               |                      |                                |
| $\beta_-$ | $0.112 \pm 0.020$             |               |                      |                                |
