# Supplementary material for: Ion counting demonstrates a high electrostatic field generated by the nucleosome
Source: eLife journal article supplement (doi:10.7554/elife.44993), 2019-06-11
Supplement: supp [file elife-44993-supp-v1.zip › elife_poa_e44993_Figure_3_source_data_4.pdf]

**Figure 3 - Source Data 4: Experimentally determined excess number ( $N_i$ ) and the  $\beta_+$  for 25 mM NaBr and 2.5 mM MgBr<sub>2</sub> around 24 bp DNA, 147 bp DNA and H3 tailless nucleosome**

|                                   | 24 bp DNA  |               |            |            | 147 bp DNA |               |             |           | H3 tailless nucleosome |               |             |             |
|-----------------------------------|------------|---------------|------------|------------|------------|---------------|-------------|-----------|------------------------|---------------|-------------|-------------|
|                                   | $N_{Na^+}$ | $N_{Mg^{2+}}$ | $N_{Br^-}$ | total      | $N_{Na^+}$ | $N_{Mg^{2+}}$ | $N_{Br^-}$  | total     | $N_{Na^+}$             | $N_{Mg^{2+}}$ | $N_{Br^-}$  | total       |
|                                   | 14.0 ± 1.0 | 13.5 ± 0.5    | -4.5 ± 1.0 | 45.0 ± 1.0 | 81.0 ± 2.0 | 95.0 ± 1.0    | -25.2 ± 1.1 | 296 ± 2.3 | 21.0 ± 1.5             | 58.0 ± 1.0    | -21.0 ± 1.0 | 157.0 ± 1.8 |
| Mg <sup>2+</sup> :Na <sup>+</sup> | 1:0.97     |               |            |            | 1.16:1     |               |             |           | 2.76:1                 |               |             |             |
