# Supplementary material for: Ion counting demonstrates a high electrostatic field generated by the nucleosome
Source: eLife journal article supplement (doi:10.7554/elife.44993), 2019-06-11
Supplement: supp [file elife-44993-supp-v1.zip › elife_poa_e44993_Figure_3_source_data_5.pdf]

**Figure 3 - Source Data 5: PB calculation of excess number ( $N_i$ ) and the  $\beta_-$  coefficient (the faction of associated anions), and the  $\beta_+$  coefficient (the faction of excluded cation) for 40 mM NaBr around histone octamer**

|           | histone octamer |            |        |
|-----------|-----------------|------------|--------|
|           | $N_{Na^+}$      | $N_{Br^-}$ | Total* |
|           | -24             | 125        | -149   |
| $\beta_+$ | 0.161           |            |        |
| $\beta_-$ | 0.838           |            |        |

\* Charges were assigned using the PDB2PQR routine with the Amber parameter, at pH = 7.5
