# Supplementary material for: Ion counting demonstrates a high electrostatic field generated by the nucleosome
Source: eLife journal article supplement (doi:10.7554/elife.44993), 2019-06-11
Supplement: supp [file elife-44993-supp-v1.zip › elife_poa_e44993_Figure_3_source_data_6.pdf]

**Figure 3 - Source Data 6: Experimentally determined excess number ( $N_i$ ) and the  $\beta_-$  coefficient (the faction of associated anions) and the  $\beta_+$  coefficient (the faction of excluded cation) for 40 mM NaBr around histones H3, H4 and (H3·H4)<sub>2</sub> tetramer**

|           | H3            |               |                |          | H4            |               |                |          | (H3·H4) <sub>2</sub> tetramer |               |                |           |
|-----------|---------------|---------------|----------------|----------|---------------|---------------|----------------|----------|-------------------------------|---------------|----------------|-----------|
|           | $N_{Na^+}$    | $N_{Br^-}$    | total          | $q_{H3}$ | $N_{Na^+}$    | $N_{Br^-}$    | total          | $q_{H4}$ | $N_{Na^+}$                    | $N_{Br^-}$    | total          | $q_{com}$ |
|           | -4.6 ±<br>1.0 | 14.0 ±<br>1.5 | -18.6 ±<br>1.8 | +20      | -4.9 ±<br>1.0 | 13.3 ±<br>0.5 | -18.2 ±<br>1.1 | +18      | -20.3 ±<br>0.5                | 57.3 ±<br>1.7 | -77.6 ±<br>1.8 | +76       |
| $\beta_-$ | 0.74 ± 0.050  |               |                |          | 0.71 ± 0.05   |               |                |          | 0.74 ± 0.006                  |               |                |           |
| $\beta_+$ | 0.25 ± 0.05   |               |                |          | 0.27 ± 0.05   |               |                |          | 0.26 ± 0.012                  |               |                |           |
