# Supplementary material for: Ion counting demonstrates a high electrostatic field generated by the nucleosome
Source: eLife journal article supplement (doi:10.7554/elife.44993), 2019-06-11
Supplement: supp [file elife-44993-supp-v1.zip › elife_poa_e44993_Figure_3_source_data_7.pdf]

**Figure 3 - Source Data 7: Experimentally determined excess number ( $N_i$ ) and the  $\beta_-$  coefficient (the faction of associated anions) and the  $\beta_+$  coefficient (the faction of excluded cation) for 40 mM NaBr around histones H2A, H2B and (H2A·H2B) dimer**

|           | H2A              |                |                 |           | H2B             |                |                 |           | (H2A·H2B) dimer |                |                 |           |
|-----------|------------------|----------------|-----------------|-----------|-----------------|----------------|-----------------|-----------|-----------------|----------------|-----------------|-----------|
|           | $N_{Na^+}$       | $N_{Br^-}$     | total           | $q_{H2A}$ | $N_{Na^+}$      | $N_{Br^-}$     | total           | $q_{H2B}$ | $N_{Na^+}$      | $N_{Br^-}$     | total           | $q_{com}$ |
|           | $-4.7 \pm 1.5$   | $10.2 \pm 1.0$ | $-15.0 \pm 1.8$ | +17       | $-5.0 \pm 1.0$  | $13.6 \pm 1.0$ | $-18.6 \pm 1.0$ | +19       | $-8.5 \pm 2.0$  | $26.5 \pm 1.8$ | $-35.0 \pm 2.2$ | +36       |
| $\beta_-$ | $0.69 \pm 0.060$ |                |                 |           | $0.73 \pm 0.04$ |                |                 |           | $0.75 \pm 0.02$ |                |                 |           |
| $\beta_+$ | $0.32 \pm 0.1$   |                |                 |           | $0.27 \pm 0.05$ |                |                 |           | $0.24 \pm 0.05$ |                |                 |           |
