# Supplementary figures and images for: Ion counting demonstrates a high electrostatic field generated by the nucleosome
Source: eLife journal article supplement (doi:10.7554/elife.44993), 2019-06-11

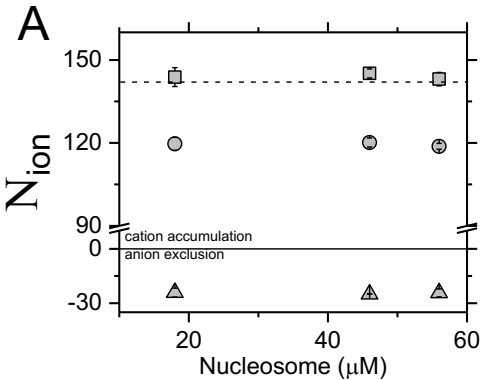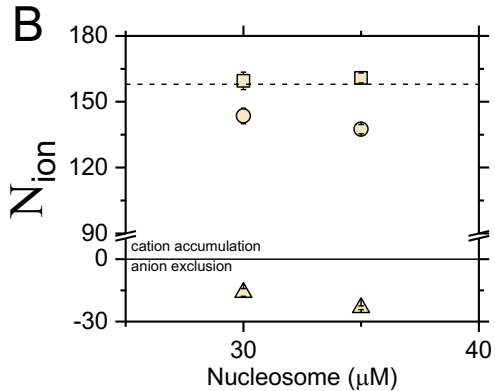

Supplement: supp [file elife-44993-supp-v1.zip › elife_poa_e44993_Figure_3_figure_supplement_1.pdf]

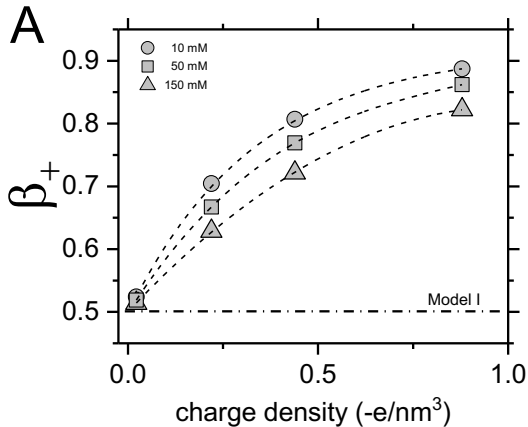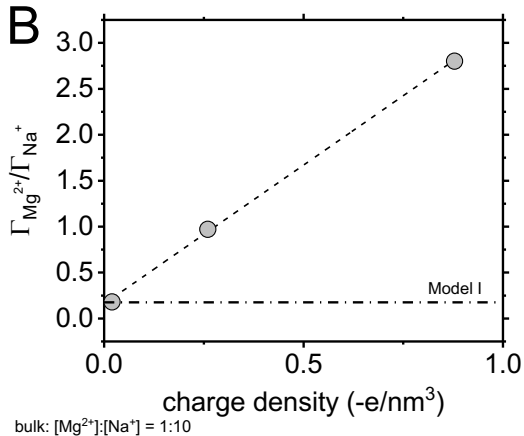

Supplement: supp [file elife-44993-supp-v1.zip › elife_poa_e44993_Figure_3_figure_supplement_3.pdf]

$kT/e$

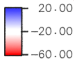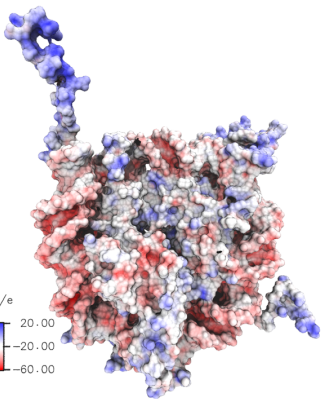

Supplement: supp [file elife-44993-supp-v1.zip › elife_poa_e44993_Figure_4_figure_supplement_1.pdf]

1 2 3 4

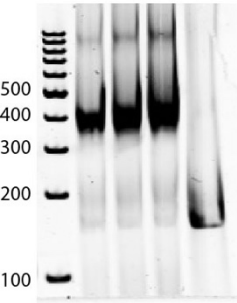

Supplement: supp [file elife-44993-supp-v1.zip › elife_poa_e44993_Figure_3_figure_supplement_2.pdf]
